# Supplementary material for: One-step synthesis of monodisperse polydopamine-coated silver core–shell nanostructures for enhanced photocatalysis
Source: Royal Society of Chemistry journal article supplement (doi:10.1039/c1nj20850k), 2011-11-16
Supplement: c1nj20850k.pdf [file c1nj20850k.pdf]

## Electronic Supplementary Material

### **One-Step Synthesis of Monodisperse Polydopamine-Coated Silver Core-Shell Nanostructures for Enhanced Photocatalysis**

Jiu-Ju Feng<sup>a,b\*</sup>, Pei-Pei Zhang<sup>b</sup>, Ai-Jun Wang<sup>a,b\*</sup>, Qi-Chen Liao<sup>b</sup>, Jun-lan Xi<sup>b</sup>, Jian-Rong Chen<sup>a</sup>

<sup>a</sup>*College of Chemistry and Life Science, College of Geography and Environmental Science, Zhejiang Normal University, Jinhua 321004, China*

<sup>b</sup>*Key Laboratory of Green Chemical Media and Reactions, Ministry of Education; School of Chemical and Environmental Science, Henan Normal University, Xinxiang, Henan 453007, China*

\*Corresponding author. *E-mail address:* jjfengnju@gmail.com (J.J. Feng) and ajwangnju@gmail.com (A.J. Wang)

**Fig. S1**

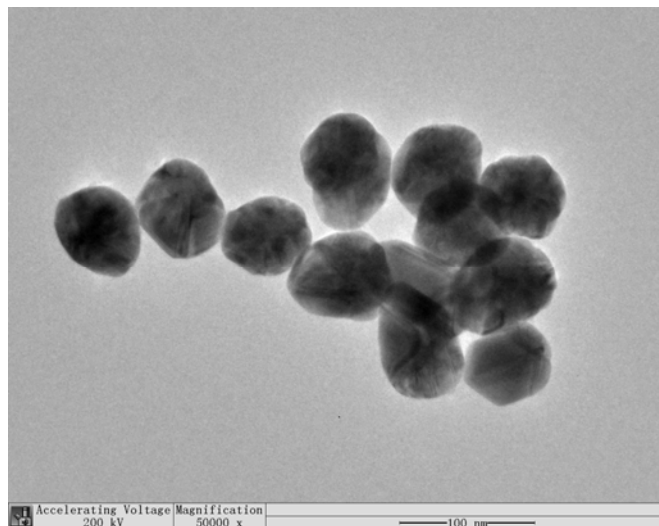

**Fig. S1** TEM image of the synthesized AgNPs.

Fig. S1 provides the morphology of the as-synthesized Ag nanostructures through TEM experiments, revealing that many AgNPs are formed with the diameter of about 60-80 nm.

**Fig. S2**

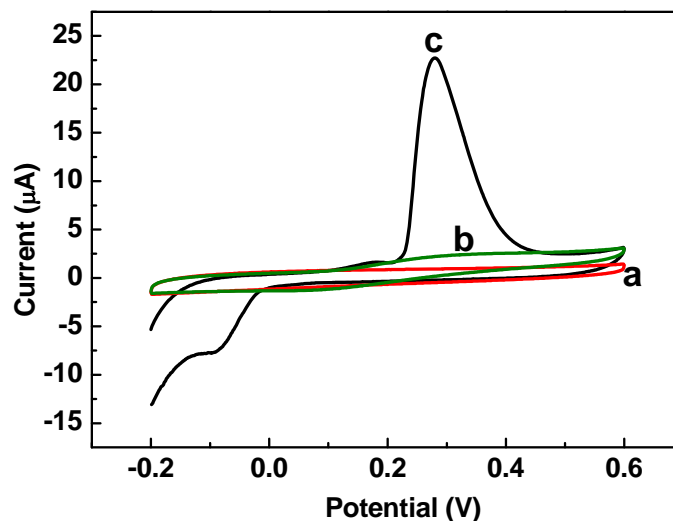

**Fig. S2** Cyclic voltammograms of the bare (a), PDA (b), and AgNPs@PDA (c) modified electrodes in 25 mM phosphate solution (pH = 7.0) at  $0.1 \text{ V} \cdot \text{s}^{-1}$

The cyclic voltammograms (CVs) of the different sample modified electrodes were recorded in phosphate solution (Fig. S2). Clearly, there is no peak appeared on the bare electrode (curve a). While, on the pure PDA modified electrode, a pair of broad and weak redox peaks is observed at 0.336 V and 0.068 V, which is ascribed to the redox peaks of PDA (curve b). Meanwhile, on the AgNPs@PDA modified electrode, there is a pair of redox peaks obviously observed at 0.278 V and -0.093 V (curve c), which is assigned to the redox peaks of the AgNPs from the electrode and further demonstrates the formation of AgNPs in the composites.

**Table S1**

| Materials and method                    | Effects of process parameters                                                               | Reaction rate constant ( <i>k</i> )                                                          | Refs.     |
|-----------------------------------------|---------------------------------------------------------------------------------------------|----------------------------------------------------------------------------------------------|-----------|
| Crystalline TiO <sub>2</sub> nanopowder | 1. Concentration of TiO <sub>2</sub> nano-powder<br>2. Irradiation time                     | _____                                                                                        | 1         |
| ZnO/Fenton                              | 1. Concentration of dye, catalyst <i>et al.</i><br>2. Irradiation time<br>3. Fenton reagent | $3.07 \times 10^{-4} \text{ s}^{-1}$                                                         | 2         |
| HPA/TiO <sub>2</sub>                    | 1. Amount of catalyst or oxidants<br>2. pH of the solution                                  | _____                                                                                        | 3         |
| TiO <sub>2</sub>                        | 1. Type of photocatalyst<br>2. pH of the solution<br>3. Concentration of dye or catalyst    | _____                                                                                        | 4         |
| AgNPs@PDA                               | 1. Concentration of dye or catalyst<br>2. Irradiation time                                  | $k_1 = 9.56 \times 10^{-2} \text{ min}^{-1}$<br>$k_2 = 0.56 \times 10^{-2} \text{ min}^{-1}$ | Our study |

**Table S1** Comparison of the experimental setup for the photocatalytic and degradation studies with those previously published in the literature.

## References

- 1 T. Rezchikova, E. Kurkin, L. Kiryukhina and E. Kabachkov, *Russ. J. Appl. Chem.*, 2010, **83**, 583.
- 2 B. Pare, P. Singh and S. B. Jonnalagadda, *Indian J. Chem. Techn.*, 2010, **17**, 391.
- 3 L. Liu, L.-M. Wang and D.-Q. Chu, *Adv. Mater. Res.*, 2010, **113-114**, 2045.
- 4 H. K. Singh, M. Saquib, M. M. Haque and M. Muneer, *Chem. Eng. J.*, 2008, **136**, 77.
